# Supplementary material
Source: PubMed Central journal article supplement (PMC6709577)
Supplement: NIHMS1042537-supplement-Online_tables_2_1-2_9.pdf [file NIHMS1042537-supplement-Online_tables_2_1-2_9.pdf]

**Online Table 2: Evidence extracted from reviews of individual level behavioural interventions to reduce blood glucose or reduce weight in people with glucose dysregulation (diabetes or pre-diabetes)**

| 2.1: Overall effectiveness |                                         |                  |                      |      |                            |         |                |                                                                                                                                                                       |                                                        |
|----------------------------|-----------------------------------------|------------------|----------------------|------|----------------------------|---------|----------------|-----------------------------------------------------------------------------------------------------------------------------------------------------------------------|--------------------------------------------------------|
| Study                      | Comparison                              | Target behaviors | Method of comparison | OQAQ | N studies (N participants) | Outcome | Follow up      | Results                                                                                                                                                               | Comments/ Limitations                                  |
| Taylor et al. 2016         | Behavioural intervention versus control | Diet and PA      | Descriptive          | 17   | 4 (NR)                     | HbA1c   | 3 to 18 months | One study showed that patients randomised to the intervention group showed improvements in HbA1c compared to the control group.                                       | Only narrative summary                                 |
| Taylor et al. 2016         | Behavioural intervention versus control | Diet and PA      | Meta-analysis        | 17   | 3 (140)                    | HbA1c   | 3 to 18 months | Behavioural interventions did not show a significant mean difference in lowering HbA1c when compared to control groups (MD = 0.18%; 95% CI, [-0.07, 0.42]; p = 0.16). | Results are based on only based on three small studies |
| Cradock et al. 2017        | Dietary intervention only vs control    | Diet             | Meta-analysis        | 14   | 59 (4882)                  | HbA1c   | 1 to 24 months | Reduction in HbA1c of 0.35%, 95% CI: -0.43 to -0.28.                                                                                                                  | Only small amounts of data beyond 12 months            |
| Mudaliar et al. 2016       | Lifestyle intervention versus control   | Diet and PA      | Meta-analysis        | 16   | 8 (NR)                     | HbA1c   | 3 to 36 months | Lifestyle interventions significantly reduced weight by -0.21% (95% CI: -0.29 to -0.13) at follow up.                                                                 | Only pre-post comparisons                              |

|                    |                                         |             |               |    |           |       |                       |                                                                                                                                               |                                                                                                                                                           |
|--------------------|-----------------------------------------|-------------|---------------|----|-----------|-------|-----------------------|-----------------------------------------------------------------------------------------------------------------------------------------------|-----------------------------------------------------------------------------------------------------------------------------------------------------------|
| Zhang et al. 2016  | Lifestyle intervention versus control   | Diet and PA | Meta-analysis | 18 | 13 (3186) | HbA1c | 12 to 54 months       | Lifestyle interventions significantly reduced HbA1c when compared to control (-0.06%, 95% CI: -0.09 to -0.03).                                |                                                                                                                                                           |
| Taylor et al. 2016 | Behavioural intervention versus control | Diet and PA | Descriptive   | 17 | 12 (NR)   | FPG   | 12 weeks to 18 months | Three studies showed that patients randomised to the intervention group showed improvements in FPG compared to the control group.             | Only narrative summary                                                                                                                                    |
| Taylor et al. 2016 | Behavioural intervention versus control | Diet and PA | Meta-analysis | 17 | 10 (956)  | FPG   | 12 weeks to 18 months | Behavioural interventions showed a significant mean reduction of FPG when compared to control (-0.28mmol/L (95% CI, [-0.43, -0.12]; p<0.001). | Investigation of baseline imbalance showed that controls had slightly lower levels of fasting glucose (MD = 0.10mmol/L; 95% CI, [-0.02, 0.23]; p = 0.10). |
| Sun et al. 2017    | Lifestyle intervention versus control   | Diet and PA | Meta-analysis | 16 | 41 (NR)   | FPG   | 12 months             | Lifestyle interventions significantly reduced FPG by 1.65 mg/dL (95% CI: 0.14 to 3.17) when compared to control.                              |                                                                                                                                                           |
| Mudaliar           | Lifestyle                               | Diet and PA | Meta-         | 16 | 21 (NR)   | FPG   | 3 to 36               | Lifestyle interventions significantly                                                                                                         | Only pre-post                                                                                                                                             |

|                   |                                       |             |               |    |           |         |                 |                                                                                                                      |                            |
|-------------------|---------------------------------------|-------------|---------------|----|-----------|---------|-----------------|----------------------------------------------------------------------------------------------------------------------|----------------------------|
| et al. 2016       | intervention versus control           | PA          | analysis      |    |           |         | months          | reduced FPG by -2.40mg/dl (95% CI: -3.59; to -1.21) at follow up.                                                    | comparisons                |
| Zhang et al. 2016 | Lifestyle intervention versus control | Diet and PA | Meta-analysis | 18 | 55 (9234) | FPG     | 12 to 54 months | Lifestyle interventions significantly reduced FPG when compared to control (-0.14mmol/L, 95% CI: -0.19 to -0.10).    |                            |
| Sun et al. 2017   | Lifestyle intervention versus control | Diet and PA | Meta-analysis | 16 | 19 (NR)   | 2-h BG  | 12 months       | Lifestyle interventions significantly reduced 2-h BG by 7.21 mg/dL (95% CI: 1.95 to 16.36) when compared to control. |                            |
| Zhang et al. 2016 | Lifestyle intervention versus control | Diet and PA | Meta-analysis | 18 | 33 (5308) | FI      | 12 to 54 months | Lifestyle interventions significantly reduced FI when compared to control (-15.18 %, 95% CI: -20.01 to -10.35).      |                            |
| Zhang et al. 2016 | Lifestyle intervention versus control | Diet and PA | Meta-analysis | 18 | 20 (2966) | HOMA-IR | 12 to 54 months | Lifestyle interventions significantly reduced HOMA-IR when compared to control (-22.82%, 95% CI: -29.14 to -16.51).  |                            |
| Sun et al. 2017   | Lifestyle intervention versus control | Diet and PA | Meta-analysis | 16 | 64 (NR)   | Weight  | 12 months       | Lifestyle interventions significantly reduced weight by 2.07 kg (95% CI: 1.52 to 2.62)when compared to control.      |                            |
| Cradock et al.    | Dietary intervention                  | Diet        | Meta-         | 14 | 54 (4496) | Weight  | 1 to 24         | Reduction in weight of 2.41Kg, 95%                                                                                   | Only small amounts of data |

|                      |                                         |             |                                              |    |             |                              |                 |                                                                                                                                              |                                           |
|----------------------|-----------------------------------------|-------------|----------------------------------------------|----|-------------|------------------------------|-----------------|----------------------------------------------------------------------------------------------------------------------------------------------|-------------------------------------------|
| 2017                 | only vs control                         |             | analysis                                     |    |             |                              | months          | CI: -2.96 to -1.86.                                                                                                                          | beyond 12 months                          |
| Mudaliar et al. 2016 | Lifestyle intervention versus control   | Diet and PA | Meta-analysis                                | 16 | 16 (NR)     | Weight                       | 3 to 36 months  | Lifestyle interventions significantly reduced weight by 2.66 kg when compared to control.                                                    | RCT design but no P values or CI reported |
| Zhang et al. 2016    | Lifestyle intervention versus control   | Diet and PA | Meta-analysis                                | 18 | 49 (8728)   | Weight                       | 12 to 54 months | Lifestyle interventions significantly reduced weight when compared to control (-3.99kg, 95% CI: -4.69 to -3.29).                             |                                           |
| Barry et al. 2017    | Diet and .or PA intervention vs control | Diet, PA    | Meta-analysis                                | 16 | 25 (10,593) | Incidence of type 2 diabetes | up to 72 months | Lifestyle interventions reduced the relative risk of developing diabetes by 36% (95%CI: 28 to 43%).                                          |                                           |
| Modesti et al. 2016  | Lifestyle interventions versus control  | Diet and PA | Meta-analysis of RCTs making this comparison | 18 | 8 (2721)    | Incidence of type 2 diabetes | 18 to 72 months | There was a 45 % reduction in the incidence of T2DM for people assigned to the intervention arm versus control (OR 0.55; 95 % CI 0.44–0.70). |                                           |

## 2.2: Maintenance of effects

| Study | Comparison | Target behaviors | Method of comparison | OQAQ | N studies (N participants) | Outcome | Follow up | Results | Comments/ Limitations |
|-------|------------|------------------|----------------------|------|----------------------------|---------|-----------|---------|-----------------------|
|-------|------------|------------------|----------------------|------|----------------------------|---------|-----------|---------|-----------------------|

|                         |                                                                       |                                                                                      |                                                |    |                                                                   |                                                                                                              |                                                             |                                                                                                                                                                                                                                                                                                                                |                                  |
|-------------------------|-----------------------------------------------------------------------|--------------------------------------------------------------------------------------|------------------------------------------------|----|-------------------------------------------------------------------|--------------------------------------------------------------------------------------------------------------|-------------------------------------------------------------|--------------------------------------------------------------------------------------------------------------------------------------------------------------------------------------------------------------------------------------------------------------------------------------------------------------------------------|----------------------------------|
| Barry et al. 2017       | Intervention effects after end of intervention vs during intervention | Diet, PA                                                                             | Sub-group meta-analyses                        | 16 | 6 (13630)                                                         | Incidence of type 2 diabetes                                                                                 | NR                                                          | Relative risk reduction for developing diabetes due to interventions fell to 20% (95%CI: 18 to 31%) in the period after intervention ceased. The reduction within the trial period was 36% (95%CI: 28 to 43%).                                                                                                                 |                                  |
| Zhang et al. 2016       | Lifestyle intervention versus control stratified by follow-up period  | Diet and PA                                                                          | Sub-group meta-analysis                        | 18 | 9 (2875), 1 (158), 4 (1242)                                       | HbA1c                                                                                                        | 12 months, 13 to 23 months, ≥23 months                      | Lifestyle interventions had similar reductions in HbA1c when compared to control at 12 months (- 0.06%, 95% CI: -0.09 to -0.02), 13 to 23 months, (- 0.10%, 95% CI: -0.18 to -0.02), and no reduction at ≥23 months, (- 0.03%, 95% CI: -0.23 to -0.001).                                                                       | Only 1 study for 13 to 23 months |
| Beishui zen et al. 2016 | Short term vs long term outcomes                                      | Multiple CV prevention behaviours (inc diet, PA, glucose monitoring, medication use) | Sub-group meta-analyses<br><br>Meta-regression | 14 | 37 (11021)<br><br>15 (2934) short term<br><br>22 (8087) long term | SMD (Hedge's g) used to pool primary outcome measures: SBP (7); HbA1c (13); weight (8); PA (6); CV composite | 0-12<br><br>12--60 months<br><br>(overall median 12 months) | The intervention effect was more pronounced in the short-term studies SMD -0.43, 95% CI: -0.57 to -0.29) than in the long-term studies (SMD -0.12, 95% CI: -0.19 to -0.06; I2=41%).<br><br>A meta-regression excluding one outlier with a 5 year follow-up found that effect size significantly decreased over time in studies |                                  |

|                   |                                                                      |             |                         |    |                                |           |                                        |                                                                                                                                                                                                                                                              |                                    |
|-------------------|----------------------------------------------------------------------|-------------|-------------------------|----|--------------------------------|-----------|----------------------------------------|--------------------------------------------------------------------------------------------------------------------------------------------------------------------------------------------------------------------------------------------------------------|------------------------------------|
|                   |                                                                      |             |                         |    |                                | score (3) |                                        | lasting 3 to 32 months (SMD -0.415+ 0.015*months; P=.008).                                                                                                                                                                                                   |                                    |
| Zhang et al. 2016 | Lifestyle intervention versus control stratified by follow-up period | Diet and PA | Sub-group meta-analysis | 18 | 46 (7626), 8 (1560), 15 (3423) | FPG       | 12 months, 13 to 23 months, ≥23 months | Lifestyle interventions had similar reductions in FPG when compared to control at 12 months (- 0.11mmol/L 95% CI: -0.15 to -0.07), 13 to 23 months, (- 0.15mmol/L 95% CI: -0.21 to -0.09), and ≥23 months, (- 0.12mmol/L 95% CI: -0.23 to -0.001).           |                                    |
| Zhang et al. 2016 | Lifestyle intervention versus control stratified by follow-up period | Diet and PA | Sub-group meta-analysis | 18 | 25 (4521), 4 (496), 15 (3426)  | FI        | 12 months, 13 to 23 months, ≥23 months | Lifestyle interventions had similar reductions in FI when compared to control at 12 months (- 15.45 %, 95% CI: -21.22 to -9.69), ≥23 months, (- 11.30 %, 95% CI: -18.68 to -3.91) but no reduction at 13 to 23 months, (- 11.04 %, 95% CI: -22.33 to 0.25).  | Only 4 studies for 13 to 23 months |
| Zhang et al. 2016 | Lifestyle intervention versus control stratified by follow-up period | Diet and PA | Sub-group meta-analysis | 18 | 16 (2267), 1 (158), 7 (1567)   | HOMA-IR   | 12 months, 13 to 23 months, ≥23 months | Lifestyle interventions had similar reductions in HOMA-IR when compared to control at 12 months (- 24.56% 95% CI: -35.52 to -13.61), ≥23 months, (-20.07%,95% CI: -27.73 to -12.40) but no reduction at 13 to 23 months, (- 14.63%, 95% CI: -32.44 to 3.18). | Only 1 study for 13 to 23 months   |
| Cai et al.        | Post-intervention                                                    | PA          | Sub-group meta-         | 14 | 2 (133)                        | BMI       | Mean 7.7 months                        | Intervention group had no significant BMI or weight reduction or regain                                                                                                                                                                                      | Low N for this                     |

|                     |                                                                             |      |                         |    |                                                                                                                   |        |                                                |                                                                                                                                                                                                                                              |                                             |
|---------------------|-----------------------------------------------------------------------------|------|-------------------------|----|-------------------------------------------------------------------------------------------------------------------|--------|------------------------------------------------|----------------------------------------------------------------------------------------------------------------------------------------------------------------------------------------------------------------------------------------------|---------------------------------------------|
| 2016                | period effects of pedometer based intervention vs no intervention.          |      | analysis                |    |                                                                                                                   | Weight | of follow up post intervention                 | over the follow-up period.<br><br>BMI: WMD -0.21 kg/m <sup>2</sup> (95% CI: -1.06 to 0.65).<br><br>Weight: WMD -0.05 kg (95% CI: -1.06 to 0.95).                                                                                             | meta-analysis.                              |
| Cradock et al. 2017 | Effects of dietary intervention only vs control stratified follow-up period | Diet | Sub-group meta-analyses | 14 | 0-3month:<br>32 (2416)<br><br>3-6month:<br>24 (2850)<br><br>6-12month:<br>14 (1704)<br><br>12-24month:<br>4 (205) | Weight | 0-3<br><br>3-6<br><br>6-12<br><br>12-24 months | Weight loss was fairly consistent over time for up to 24 months of follow up.<br><br>0-3months: 2.34 kg (95% CI: -2.99, to -1.69),<br><br>3-6month: -2.94 kg (95% CI: -3.92, to -1.97).<br><br>6-12months: 2.27 kg (95% CI: -3.32 to -1.21). | Only small amounts of data beyond 12 months |

|                      |                                                                                   |             |                         |    |                                |           |                                                    |                                                                                                                                                                                                                                     |                                                                                       |
|----------------------|-----------------------------------------------------------------------------------|-------------|-------------------------|----|--------------------------------|-----------|----------------------------------------------------|-------------------------------------------------------------------------------------------------------------------------------------------------------------------------------------------------------------------------------------|---------------------------------------------------------------------------------------|
|                      |                                                                                   |             |                         |    |                                |           |                                                    | 12-24months: -2.14 kg (95% CI: -3.34 to -0.93).                                                                                                                                                                                     |                                                                                       |
| Zhang et al. 2016    | Lifestyle intervention versus control stratified by follow-up period              | Diet and PA | Sub-group meta-analysis | 18 | 41 (7188), 6 (1289), 15 (3424) | Weight kg | 12 months<br><br>13 to 23 months<br><br>≥23 months | Lifestyle interventions had similar reductions in % body weight when compared to control at 12 months (-3.68 95% CI: -4.50 to -2.87), 13 to 23 months (-3.28 95% CI: -4.39 to -2.17) and ≥23 months (-3.58 95% CI: -4.98 to -2.19). |                                                                                       |
| Mudaliar et al. 2016 | Lifestyle intervention with maintenance component versus no maintenance component | Diet and PA | Sub-group meta-analysis | 16 | 16 (NR)                        | Weight    | 3 to 36 months                                     | Lifestyle interventions with a maintenance component had a larger reduction in weight (-4.36 kg, 95% CI: -5.47 to -3.26) than interventions with no maintenance component (-2.70 kg, 95% CI: -3.59 to -1.80).                       | Very small overlap in CIs meaning that these differences are likely to be significant |
| Mudaliar et al. 2016 | Lifestyle intervention with maintenance                                           | Diet and PA | Meta-analysis           | 16 | 21 (NR)                        | FPG       | 3 to 36 months                                     | Lifestyle interventions with a maintenance component had a significantly larger reduction in FPG (-4.00 mg/dl, 95% CI: (-4.93 to -3.07)                                                                                             | Non-overlapping CIs indicating significance                                           |



|                                |                                                                                         |                                     |                         |    |                               |       |                       |                                                                                                                                                                                                                  |                                                          |
|--------------------------------|-----------------------------------------------------------------------------------------|-------------------------------------|-------------------------|----|-------------------------------|-------|-----------------------|------------------------------------------------------------------------------------------------------------------------------------------------------------------------------------------------------------------|----------------------------------------------------------|
|                                | component versus Lifestyle intervention with no maintenance component                   |                                     |                         |    |                               |       |                       | than interventions with no maintenance component (-0.86 mg/dl, 95% CI: (-2.75 to 1.03).                                                                                                                          |                                                          |
| <b>2.3: Behavioural target</b> |                                                                                         |                                     |                         |    |                               |       |                       |                                                                                                                                                                                                                  |                                                          |
| Zhang et al. 2016              | Lifestyle intervention versus usual care stratified by only PA, only diet and diet + PA | PA only<br>Diet only<br>PA and diet | Sub group meta-analysis | 18 | 3 (1227), 1 (50), 9 (1909)    | HbA1c | 12 to 54 months       | Lifestyle interventions showed no significant reductions in HbA1c for PA (-0.04% 95% CI: -0.08 to 0.01), diet (-0.04%, 95% CI: -0.23 to 0.23), but small reductions for diet + PA (-0.07% 95% CI: -0.12, -0.03). | Small number of studies for all groups                   |
| Taylor et al. 2016             | Behavioural intervention versus control (Only PA)                                       | PA component present                | Sub group meta-analysis | 17 | 7 (NR)                        | FPG   | 12 weeks to 18 months | Participants receiving an intervention that included PA showed an improvement in FPG (-0.33mmol/L, 95% CI:-0.52 to -0.14], p = 0.001) compared to usual care.                                                    | Interventions could also include other components        |
| Zhang et al. 2016              | Lifestyle intervention versus usual care stratified by                                  | PA only<br>Diet only<br>PA and diet | Sub group meta-analysis | 18 | 14 (1813), 7 (499), 34 (7021) | FPG   | 12 to 54 months       | Lifestyle interventions had largest reduction in FPG when diet was targeted (-0.17 mmol/l, 95% CI: -0.27 to -0.08) followed by PA + diet (-0.15 mmol/l, 95% CI: -0.21 to -0.09)                                  | Only 7 studies for diet could be reason for large effect |

|                   |                                                                                         |                                     |                         |    |                                |             |                 |                                                                                                                                                                                                                                                  |                                                              |
|-------------------|-----------------------------------------------------------------------------------------|-------------------------------------|-------------------------|----|--------------------------------|-------------|-----------------|--------------------------------------------------------------------------------------------------------------------------------------------------------------------------------------------------------------------------------------------------|--------------------------------------------------------------|
|                   | only PA, only diet and diet + PA                                                        |                                     |                         |    |                                |             |                 | followed by PA alone ( - 0.07 mmol/l, 95% CI: -0.11 to -0.03).                                                                                                                                                                                   |                                                              |
| Zhang et al. 2016 | Lifestyle intervention versus usual care stratified by only PA, only diet and diet + PA | PA only<br>Diet only<br>PA and diet | Sub group meta-analysis | 18 | 9 (1555), 5 (321), 19 (3432)   | FI          | 12 to 54 months | Lifestyle interventions showed no significant reductions in FI for PA (-7.61% 95% CI: -15.52 to 0.30), or diet (-13.73%, 95% CI: -28.64 to 1.18), but did find differences for diet + PA (-18.25% 95% CI: -24.18 to -12.32).                     |                                                              |
| Zhang et al. 2016 | Lifestyle intervention versus usual care stratified by only PA, only diet and diet + PA | PA only<br>Diet only<br>PA and diet | Sub group meta-analysis | 18 | 5 (233), 2 (282), 12 (2551)    | HOMA-IR     | 12 to 54 months | Lifestyle interventions showed no significant reductions in HOMA-IR for PA (-7.25% 95% CI: -19.02 to 4.51), but did find significant reductions for diet (-24.24%, 95% CI: -37.21 to -11.27), and diet + PA (-24.76%, 95% CI: -31.92 to -17.60). |                                                              |
| Cai et al. 2016   | Adding pedometer intervention to dietary counselling vs pedometer intervention          | PA and diet<br>Diet only            | Sub-group meta-analyses | 14 | 8 (1130) BMI<br>7 (805) Weight | BMI, weight | 6 to 48 weeks   | Pedometer intervention alongside dietary counselling resulted in significant declines in BMI (WMD -0.30 kg/m <sup>2</sup> , 95% CI: -0.50 to -0.10) and weight (WMD -0.86 kg, 95% CI: -1.45 to -0.27). Pedometer interventions alone had         | Methodological quality of included RCTs was low to moderate. |

|                   |                                                                                         |                                     |                         |    |                               |        |                 |                                                                                                                                                                                                                                        |                                                                           |
|-------------------|-----------------------------------------------------------------------------------------|-------------------------------------|-------------------------|----|-------------------------------|--------|-----------------|----------------------------------------------------------------------------------------------------------------------------------------------------------------------------------------------------------------------------------------|---------------------------------------------------------------------------|
|                   | alone.                                                                                  |                                     |                         |    |                               |        |                 | no significant effects on BMI (WMD - 0.09, 95%CI: -0.20 to 0.03) and weight (WMD -0.27, 95%CI: -1.06 to 0.52).                                                                                                                         |                                                                           |
| Zhang et al. 2016 | Lifestyle intervention versus usual care stratified by only PA, only diet and diet + PA | PA only<br>Diet only<br>PA and diet | Sub group meta-analysis | 18 | 12 (1663), 6 (433), 31 (6632) | Weight | 12 to 54 months | Lifestyle interventions had largest reduction in weight when diet was targeted (-6.21 kg, 95% CI: -8.63 to -3.19), (followed by PA + diet (-4.12 kg, 95% CI: -4.93 to -3.30), followed by PA alone (-1.55 Kg, 95% CI: -2.53 to -0.57). | Small number of studies for diet and PA alone compared to diet + PA alone |
|                   |                                                                                         |                                     |                         |    |                               |        |                 |                                                                                                                                                                                                                                        |                                                                           |

#### 2.4: Theoretical basis/main underlying model

| Study               | Comparison                                                 | Target behaviors | Method of comparison | OQAQ | N studies (N participants) | Outcome | Follow up      | Results                                                                                                                                       | Comments/ Limitations |
|---------------------|------------------------------------------------------------|------------------|----------------------|------|----------------------------|---------|----------------|-----------------------------------------------------------------------------------------------------------------------------------------------|-----------------------|
| Cradock et al. 2017 | Impact of stated theoretical basis on dietary intervention | Diet             | Moderator analysis   | 14   | 32 (nr)                    | HbA1c   | 1 to 24 months | The use of a theoretical model or framework was non-significantly associated with a clinically meaningful reduction in HbA1c (0.33%, p=0.10). |                       |

|                                         | effectiveness                                                                                   |                                    |                         |      |                            |         |                |                                                                                                                                                                                                                                                                                                      |                                                             |
|-----------------------------------------|-------------------------------------------------------------------------------------------------|------------------------------------|-------------------------|------|----------------------------|---------|----------------|------------------------------------------------------------------------------------------------------------------------------------------------------------------------------------------------------------------------------------------------------------------------------------------------------|-------------------------------------------------------------|
| Odgers-Jewell et al. 2017               | Effectiveness of group based interventions based on a theoretical model vs no theoretical model | Positive self-management behaviors | Sub group meta-analyses | 18   | 24 (4316)<br>23 (2739)     | HbA1c   | 6 to 60 months | Group based interventions based on a theoretical model significantly reduced HbA1c compared to control (MD = -0.39% 95% CI: -0.65 to -0.12).<br><br>Group based interventions not based on a theoretical model significantly reduced HbA1c compared to control (MD = -0.27% 95% CI: -0.46 to -0.09). |                                                             |
| <b>2.5: Behaviour Change Techniques</b> |                                                                                                 |                                    |                         |      |                            |         |                |                                                                                                                                                                                                                                                                                                      |                                                             |
| Study                                   | Comparison                                                                                      | Target behaviors                   | Method of comparison    | OQAQ | N studies (N participants) | Outcome | Follow up      | Results                                                                                                                                                                                                                                                                                              | Comments/ Limitations                                       |
| <i>Self-monitoring (blood glucose)</i>  |                                                                                                 |                                    |                         |      |                            |         |                |                                                                                                                                                                                                                                                                                                      |                                                             |
| Zhu et al. 2016                         | SMBG with usual care vs. usual care                                                             | Monitoring of blood glucose        | Meta-analysis           | 16   | 18 (3383)                  | HbA1c   | NR             | SMBG interventions performed better than controls for HbA1c (MD -0.33, 95% CI -0.45 to -0.22).                                                                                                                                                                                                       | Follow up period not reported. Measurement units not stated |
| Zhu et al. 2016                         | SMBG with usual care vs. usual                                                                  | Monitoring of blood glucose        | Meta-analysis           | 16   | 3 (1366)                   | FPG     | NR             | SMBG interventions did not perform better than control for FPG.                                                                                                                                                                                                                                      | Follow up period not reported. Only 3 studies.              |

|                             |                                                                                                  |                             |               |    |                     |               |                |                                                                                                                |                                                                                                                        |
|-----------------------------|--------------------------------------------------------------------------------------------------|-----------------------------|---------------|----|---------------------|---------------|----------------|----------------------------------------------------------------------------------------------------------------|------------------------------------------------------------------------------------------------------------------------|
|                             | care                                                                                             |                             |               |    |                     |               |                |                                                                                                                |                                                                                                                        |
| Zhu et al. 2016             | SMBG with usual care vs. usual care                                                              | Monitoring of blood glucose | Meta-analysis | 16 | 9 (1391)            | BMI           | NR             | SMBG interventions performed better than controls for BMI (-0.65 kg/m <sup>2</sup> ; -1.18 to -0.12).          | Follow up period not reported                                                                                          |
| Zhu et al. 2016             | SMBG with usual care vs. usual care                                                              | Monitoring of blood glucose | Meta-analysis | 16 | 8 (1841)            | Weight        | NR             | SMBG interventions did not perform better than control for weight.                                             | Follow up period not reported                                                                                          |
| <i>Self-monitoring (PA)</i> |                                                                                                  |                             |               |    |                     |               |                |                                                                                                                |                                                                                                                        |
| Baskerville et al. 2017     | Self-monitoring of PA plus usual care (UC) or standardised intervention (SI) vs. UC (or SI) only | PA                          | Meta-analysis | 16 | 7 (182)             | Weight or BMI | 1 to 18 months | Intervention did not reduce weight or BMI significantly more than controls (SMD = +0.10, 95% CI: -0.2 to 0.3). | Component studies mostly had a moderate risk of bias and the pooled sample size under-pinning the meta-analysis is low |
| Cai et al. 2016             | Pedometer based intervention vs no intervention (or dietary                                      | PA                          | Meta-analysis | 14 | 8 (1130)<br>7 (805) | BMI<br>Weight | 6 to 48 weeks  | Interventions significantly reduced BMI and weight.<br><br>BMI: Weighted Mean Diff -0.15                       | Methodological quality of included RCTs was low to moderate. Effects were                                              |

|                                          |                                                                                                  |      |               |    |           |       |                |                                                                                                                                                                                               |                                  |
|------------------------------------------|--------------------------------------------------------------------------------------------------|------|---------------|----|-----------|-------|----------------|-----------------------------------------------------------------------------------------------------------------------------------------------------------------------------------------------|----------------------------------|
|                                          | advice + pedometer + vs dietary advice only)                                                     |      |               |    |           |       |                | kg/m <sup>2</sup> (95%CI: -0.29 to -0.02).<br><br>Weight: Weighted Mean Diff -0.65 kg, (95% CI: -1.12 to -0.17).                                                                              | concentrated in 2 studies.       |
| Baskerville et al. 2017                  | Self-monitoring of PA plus usual care (UC) or standardised intervention (SI) vs. UC (or SI) only | PA   | Meta-analysis | 16 | 10 (1372) | PA    | 1 to 18 months | Self-monitoring of PA increased PA (SMD 0.57, 95% CI 0.24, 0.91).                                                                                                                             |                                  |
| <i>Other behaviour change techniques</i> |                                                                                                  |      |               |    |           |       |                |                                                                                                                                                                                               |                                  |
| Fu et al. 2016                           | Carbohydrate counting on versus other diabetes diet method or usual diabetes dietary education   | Diet | Meta-analysis | 16 | 10 (773)  | HbA1c | NR             | Carbohydrate counting was associated with a significant reduction in HbA1c compared to other diabetes diet method or usual diabetes dietary education (SMD = -0.35%, 95% CI: -0.65 to -0.05). | Duration of effects not reported |

|                   |                                                                                             |                                        |                                                          |    |         |                      |             |                                                                                                                                                                                                         |                                                                                                    |
|-------------------|---------------------------------------------------------------------------------------------|----------------------------------------|----------------------------------------------------------|----|---------|----------------------|-------------|---------------------------------------------------------------------------------------------------------------------------------------------------------------------------------------------------------|----------------------------------------------------------------------------------------------------|
| Fu et al. 2016    | Carbohydrate counting versus other diabetes diet method or usual diabetes dietary education | Diet                                   | Meta-analysis                                            | 16 | 3 (NR)  | Hypoglycaemia events | NR          | Carbohydrate counting was not associated with a reduction in hypoglycaemia events when compared to other diabetes diet method or usual diabetes dietary education (SMD = -0.14, 95% CI: -0.39 to 0.10). | Duration of effects not reported                                                                   |
| Fu et al. 2016    | Carbohydrate counting versus other diabetes diet method or usual diabetes dietary education | Diet                                   | Meta-analysis                                            | 16 | 3 (NR)  | BMI                  | NR          | Carbohydrate counting was not associated with a reduction in BMI when compared to other diabetes diet method or usual diabetes dietary education (SMD = -0.06, 95% CI: -0.39 to 0.28).                  | Duration of effects not reported                                                                   |
| Ekong et al. 2016 | Intervention based on motivational interviewing vs control                                  | Diet, PA, smoking or alcohol reduction | Descriptive analysis /counting of sig or non-sig results | 14 | 13 (nr) | HbA1c                | 3-24 months | A significant difference for the MI group compared to control was reported in three of the thirteen studies reporting HbA1c.                                                                            | Risk of bias in the component studies was moderate to high in most cases. Fidelity of intervention |

|                       |                                                            |                                            |                                                          |    |          |                                             |             |                                                                                                                                                              |                                                                                                                                                                                |
|-----------------------|------------------------------------------------------------|--------------------------------------------|----------------------------------------------------------|----|----------|---------------------------------------------|-------------|--------------------------------------------------------------------------------------------------------------------------------------------------------------|--------------------------------------------------------------------------------------------------------------------------------------------------------------------------------|
|                       |                                                            |                                            |                                                          |    |          |                                             |             |                                                                                                                                                              | delivery is cited as a factor likely to underlie the variation in outcomes.                                                                                                    |
| Thepwongsa et al 2017 | MI versus control                                          | Behaviours associated with type 2 diabetes | Descriptive                                              | 16 | 8 (1930) | FPG, HbA1c, BMI, WC and physical activities | NR          | Two thirds of the studies found a significant improvement in at least one of the patient outcomes.                                                           | No follow up stated. Lack of detail in narrative synthesis .                                                                                                                   |
| Ekong et al. 2016     | Intervention based on motivational interviewing vs control | Diet, PA, smoking or alcohol reduction     | Descriptive analysis /counting of sig or non-sig results | 14 | 10 (nr)  | BMI or weight                               | 3-24 months | A significant difference for the MI group compared to control was reported in two of the ten studies reporting these outcomes (1/2 for weight, 1/8 for BMI). | Risk of bias in the component studies was moderate to high in most cases. Fidelity of intervention delivery is cited as a factor likely to underlie the variation in outcomes. |
| Ekong et al. 2016     | Intervention based on motivational interviewing            | Diet, PA, smoking or alcohol               | Descriptive analysis /counting of sig or                 | 14 | 6 (nr)   | PA (self-reported)                          | 3-24 months | No significant difference for the MI group compared to control was reported in any of the six studies                                                        | Risk of bias in the component studies was moderate to high                                                                                                                     |



|                     |                                                                              |           |                    |    |           |       |                |                                                                                                                                                                                                                                                                                                                                                                                                                                                                                                                                                                                        |                                                                                                                                                                                                 |
|---------------------|------------------------------------------------------------------------------|-----------|--------------------|----|-----------|-------|----------------|----------------------------------------------------------------------------------------------------------------------------------------------------------------------------------------------------------------------------------------------------------------------------------------------------------------------------------------------------------------------------------------------------------------------------------------------------------------------------------------------------------------------------------------------------------------------------------------|-------------------------------------------------------------------------------------------------------------------------------------------------------------------------------------------------|
|                     | vs control                                                                   | reduction | non-sig results    |    |           |       |                | reporting physical activity.                                                                                                                                                                                                                                                                                                                                                                                                                                                                                                                                                           | in most cases. Fidelity of intervention delivery is cited as a factor likely to underlie the variation in outcomes.                                                                             |
| Cradock et al. 2017 | Association of using specific BCTs on effectiveness of Dietary interventions | Diet      | Moderator analyses | 14 | 54 (4496) | HbA1c | 1 to 24 months | <p>Initial moderator analysis showed. No were associated with <math>\geq 0.3\%</math> reduction in HbA1c.</p> <p>Subgroup analysis using only “true” control groups showed that the BCTs “social comparison” (0.52%), <math>P = 0.012</math>) and “feedback on behavior” (0.365%), <math>P = 0.046</math>) were associated with clinically and statistically significant reductions in HbA1c.</p> <p>Subgroup analysis of BCTs reporting outcome changes at 3 months showed that the BCT “problem solving” (0.63%) was associated with clinically significant reductions in HbA1c.</p> | Analyses are highly exploratory. Multiple analyses may lead to spurious results. Effects of combinations of BCTs are hard to unpick. Reporting of intervention content was reported to be poor. |

|                     |                                                                                                       |      |                         |    |                                    |       |                |                                                                                                                                                                                                                                                                                                                                                                                                                                            |                                                                                                      |
|---------------------|-------------------------------------------------------------------------------------------------------|------|-------------------------|----|------------------------------------|-------|----------------|--------------------------------------------------------------------------------------------------------------------------------------------------------------------------------------------------------------------------------------------------------------------------------------------------------------------------------------------------------------------------------------------------------------------------------------------|------------------------------------------------------------------------------------------------------|
|                     |                                                                                                       |      |                         |    |                                    |       |                | <p>Subgroup analysis of interventions aimed at changing behavior found the BCTs “feedback on behavior” (0.52%, P = 0.007) and “adding objects to the environment” (0.39%) were associated with clinically significant reductions in HbA1c.</p> <p>Subgroup analysis of interventions aimed at changing the dietary environment found the BCT “problem solving” (0.5%) was associated with a clinically significant reduction in HbA1c.</p> |                                                                                                      |
| Cradock et al. 2017 | Providing food /meals (PF) (changing the food environment ) vs other behaviour change (BC) techniques | Diet | Sub-group meta-analyses | 14 | PF: 17 (1271)<br><br>BC: 39 (3319) | HbA1c | 1 to 24 months | <p>Providing food provided greater effects on HbA1c than using other BCTs.</p> <p>PF: Mean Diff -0.50% (95%CI: -0.65 to -0.34).</p> <p>BC: Mean Diff of -0.3% (95%CI: -0.40 to -0.23).</p>                                                                                                                                                                                                                                                 | Differences may reflect differences in follow up time between sub-groups (these are not summarised). |
| Cai et al.          | Pedometer intervention                                                                                | PA   | Sub-group meta-         | 14 | 8 (1130)                           | BMI   | 6 to 48 weeks  | Interventions with or without step goals had similar effects on BMI                                                                                                                                                                                                                                                                                                                                                                        | Not clear who set the step goals                                                                     |

|                 |                                                                                                |                                    |                         |    |                                                                               |        |                |                                                                                                                                                                                                                                                                                                                  |                                                                                                                                                                                                    |
|-----------------|------------------------------------------------------------------------------------------------|------------------------------------|-------------------------|----|-------------------------------------------------------------------------------|--------|----------------|------------------------------------------------------------------------------------------------------------------------------------------------------------------------------------------------------------------------------------------------------------------------------------------------------------------|----------------------------------------------------------------------------------------------------------------------------------------------------------------------------------------------------|
| 2016            | with vs without step goals                                                                     |                                    | analyses                |    |                                                                               | Weight |                | <p>(WMD with: -0.18, 95%CI: -0.41 to 0.05 vs WMD without -0.14, 95%CI: -0.34 to 0.06).</p> <p>Interventions without step goals had slightly higher effects on weight (WMD with: -0.27, 95%CI: -1.06 to 0.52 vs WMD without -0.86, 95%CI: -1.45 to -0.27).</p>                                                    | (i.e. patient or provider) and it seems counter-intuitive to have a pedometer-based intervention without this element, so this result may simply reflect lack of detail in intervention reporting. |
| Cui et al. 2016 | Mobile phone intervention compared to usual care stratified by presence or absence of feedback | Diabetes self-care, inc. diet & PA | Sub-group meta-analyses | 15 | 6 (884) with<br><br>No data on k(N) was provided for studies without feedback | HbA1c  | 3 to 12 months | <p>The pooled effect size for HbA1c reduction for “mHealth with feedback” was statistically significant: -0.40% (95% CI -0.69 to -0.11%). For “mHealth without feedback,” the pooled effect size for HbA1c reduction was slightly larger, but not statistically significant: -0.46% (95% CI -1.19 to 0.26%).</p> | It is hard to conclude anything from this as the effect sizes are similar and the “without feedback” analysis may have been under-powered.                                                         |

| 2.6: Intensity of intervention |                                                                                                  |                  |                         |      |                            |                              |                          |                                                                                                                                                                                                                                                                                                       |                                                                                                                                                                                                           |
|--------------------------------|--------------------------------------------------------------------------------------------------|------------------|-------------------------|------|----------------------------|------------------------------|--------------------------|-------------------------------------------------------------------------------------------------------------------------------------------------------------------------------------------------------------------------------------------------------------------------------------------------------|-----------------------------------------------------------------------------------------------------------------------------------------------------------------------------------------------------------|
| Study                          | Comparison                                                                                       | Target behaviors | Method of comparison    | OQAQ | N studies (N participants) | Outcome                      | Follow up                | Results                                                                                                                                                                                                                                                                                               | Comments/ Limitations                                                                                                                                                                                     |
| Barry et al. 2017              | Effectiveness of diet and /or PA interventions lasting 6-24 months vs those lasting 36-72 months | Diet, PA         | Sub-group meta-analyses | 16   | 25 (10,593)                | Incidence of type 2 diabetes | 1 to 72 months           | Lifestyle interventions lasting six months to two years reduced the relative risk of developing diabetes by 31% (95% CI: 15% to 44%). Lifestyle interventions lasting three to six years showed a 37% (28% to 46%) reduction in relative risk. The sub-group difference was not significant (p=0.47). | Although the risk-reduction is similar, as diabetes incidence increased over time, the Number Needed to Treat was substantially lower for longer interventions. NNT=12 (95%CI 10 to 15) vs 33 (23 to 67). |
| Baskerville et al. 2017        | Effectiveness of studies with longer intervention duration (>=12 months) vs shorter              | PA               | Sub-group meta-analyses | 16   | 10 (1372)                  | PA                           | 0-12<br><br>12-18 months | There were no differences between studies grouped by length of intervention of <12 months; SMD 0.51 (95% CI 0.11 to 1.13) vs 12 months or more; SMD 0.68 (95% CI 0.30 to 1.07).                                                                                                                       | Not clear if PA was measured objectively. Component studies mostly had a moderate risk of bias. Given high variance in                                                                                    |

|                              | duration.                                                                                                                   |                                       |                             |             |                                   |                |                  |                                                                                                                             | measures of PA, this analysis is likely to be underpowered.                                                                                                                        |
|------------------------------|-----------------------------------------------------------------------------------------------------------------------------|---------------------------------------|-----------------------------|-------------|-----------------------------------|----------------|------------------|-----------------------------------------------------------------------------------------------------------------------------|------------------------------------------------------------------------------------------------------------------------------------------------------------------------------------|
| <b>2.7: Mode of delivery</b> |                                                                                                                             |                                       |                             |             |                                   |                |                  |                                                                                                                             |                                                                                                                                                                                    |
| <b>Study</b>                 | <b>Comparison</b>                                                                                                           | <b>Target behaviors</b>               | <b>Method of comparison</b> | <b>OQAQ</b> | <b>N studies (N participants)</b> | <b>Outcome</b> | <b>Follow up</b> | <b>Results</b>                                                                                                              | <b>Comments/ Limitations</b>                                                                                                                                                       |
| <i>Digital delivery</i>      |                                                                                                                             |                                       |                             |             |                                   |                |                  |                                                                                                                             |                                                                                                                                                                                    |
| Porter et al. 2016           | Mobile electronic devices, multi component diabetes management strategies versus usual care or alternative treatment models | Diabetes self-management, diet and PA | Descriptive                 | 17          | 9 (NR)                            | HbA1c, FPG, TG | 3 to 12 months   | Significantly greater improvement in HbA1c in the intervention group compared to the control group in four of nine studies. | Not possible to attribute whether the effect (or lack of) on HbA1c was attributable to recording of food or nutrient intake using a mobile device.<br><br>Only narrative synthesis |
| Yasmin et al.                | Short message                                                                                                               | Self-management                       | Descriptive                 | 14          | 4 (490)                           | HbA1c          | 3 to 12 months   | 3 studies reported on clinical outcome; 2 on type 2 and 1 on type                                                           |                                                                                                                                                                                    |

|                         |                                                                                         |                                                                  |               |    |           |       |                                |                                                                                                                      |                                                                               |
|-------------------------|-----------------------------------------------------------------------------------------|------------------------------------------------------------------|---------------|----|-----------|-------|--------------------------------|----------------------------------------------------------------------------------------------------------------------|-------------------------------------------------------------------------------|
| 2016                    | service and voice call interventions versus control                                     | nt, diet and PA                                                  |               |    |           |       |                                | 1 Diabetes. No significant differences in the mean HbA1C value was found.                                            |                                                                               |
| Wang et al. 2017        | mHealth intervention versus control                                                     | Diet, PA and self-management                                     | Descriptive   | 14 | 10 (NR)   | HbA1c | NR                             | 5 of 10 studies found that mHealth interventions resulted in significantly improved HbA1c.                           | No data on follow up period and only pre-post studies.                        |
| Cui et al. 2016         | Mobile phone app strategies compared to standard diabetes care                          | Diabetes self management                                         | Meta-analysis | 15 | 6 (884)   | HbA1c | 3 to 12 months                 | Mobile phone apps significantly reduced HbA1c by -0.40% (95% CI: -0.69 to -0.11) compared to standard diabetes care. | Substantial heterogeneity in the overall pooled effect (I <sup>2</sup> = 77%) |
| Beishui zen et al. 2016 | Web-based intervention plus usual care (UC) vs UC (sometimes with minimal intervention) | Any combination of diet, PA, medication -use, glucose monitoring | Meta-analysis | 14 | 21 (6518) | HbA1c | 3-60 months (median 12 months) | Intervention significantly reduced HbA1c more than controls (Mean Diff -0.13%, 95% CI: -0.22 to -0.05).              |                                                                               |
| Arambepola              | Mobile messaging                                                                        | Diet, PA or                                                      | Meta-         | 17 | 13(1155)  | HbA1c | 2-12 months                    | Significant difference in HbA1c favouring intervention of -0.53%                                                     | Only a minority of the trials had                                             |

|                          |                                                                                                                                 |             |                         |    |         |     |                   |                                                                                                                                                                                                                                                                                                                                     |                                                                                                                                                                    |
|--------------------------|---------------------------------------------------------------------------------------------------------------------------------|-------------|-------------------------|----|---------|-----|-------------------|-------------------------------------------------------------------------------------------------------------------------------------------------------------------------------------------------------------------------------------------------------------------------------------------------------------------------------------|--------------------------------------------------------------------------------------------------------------------------------------------------------------------|
| et al.<br>2016           | plus usual care (UC) vs UC or UC+ minimal intervention                                                                          | both        | analysis                |    |         |     | (median 6 months) | (95%CI -0.59% to -0.47%).                                                                                                                                                                                                                                                                                                           | low risk of bias                                                                                                                                                   |
| Mudali ar et al.<br>2016 | Lifestyle interventions delivered by community workers versus delivered by health professionals versus electronically delivered | Diet and PA | Sub-group meta-analysis | 16 | 21 (NR) | FPG | 3 to 36 months    | No "statistically significant" differences in FPG were observed between different delivery modes.<br><br>Community workers (Mean diff = +1.78 mg/dl, 95%CI: -4.47 to 8.04).<br><br>Health professionals (Mean diff = -2.87 mg/dl, 95%CI: -4.34 to -1.40).<br><br>Electronic media (Mean diff = -3.08 mg/dl, 95%CI: -5.22 to -0.94). | "Significant differences" defined conservatively in terms of CI's not overlapping. CIs for community workers were very wide.<br><br>N of participants not reported |
| Sun et al.<br>2017       | Lifestyle intervention delivered in person versus by technology (e.g. mobile)                                                   | Diet and PA | Sub-group meta-analysis | 16 | NR (NR) | FPG | 6 months          | Lifestyle interventions delivered in person reduced FPG (Mean Diff = -0.95 mg/dl, 95% CI: -2.71 to -0.80).<br>Interventions delivered by technology produced no significant difference (-0.27 mg/dl, 95% CI: -0.87 to 0.34).                                                                                                        | No data on N studies or participants                                                                                                                               |

|                         |                                                                                         |                                     |               |    |           |        |                         |                                                                                                                                                                 |                                                                                                             |
|-------------------------|-----------------------------------------------------------------------------------------|-------------------------------------|---------------|----|-----------|--------|-------------------------|-----------------------------------------------------------------------------------------------------------------------------------------------------------------|-------------------------------------------------------------------------------------------------------------|
| Wang et al. 2017        | mHealth intervention versus control                                                     | Diet, PA and self-management        | Descriptive   | 14 | 14 (NR)   | Weight | 1 to 24 months          | 6 studies (43%) found that mHealth interventions produced higher reductions in weight loss or waist circumference than controls.                                | Only pre-post studies.<br><br>Only one study >12 months duration and no effect on weight at this time-point |
| Beishui zen et al. 2016 | Web-based intervention plus usual care (UC) vs UC (sometimes with minimal intervention) | Diet, PA or both                    | Meta-analysis | 14 | 17 (3713) | Weight | 3-30 months (median 12) | Intervention significantly reduced weight more than controls (Mean Diff -1.34 kg, 95% CI: -1.91 to -0.77).                                                      |                                                                                                             |
| Cui et al. 2016         | Mobile phone app strategies compared to standard diabetes care                          | Diabetes self management, diet & PA | Meta-analysis | 15 | 4 (572)   | Weight | 3 to 12 months          | No significant reductions in weight for those using mHealth compared to standard diabetes care (effect size: -0.84 kg, 95% CI: -2.04 to 0.36 mmol/l, p = 0.17). | Low heterogeneity (I <sup>2</sup> = 30%, p for heterogeneity = 0.23).                                       |



|                        |                                                                                                                                 |                  |                         |    |           |        |                                    |                                                                                                                                                                                                                                                                                                   |                                                                                                                                                 |
|------------------------|---------------------------------------------------------------------------------------------------------------------------------|------------------|-------------------------|----|-----------|--------|------------------------------------|---------------------------------------------------------------------------------------------------------------------------------------------------------------------------------------------------------------------------------------------------------------------------------------------------|-------------------------------------------------------------------------------------------------------------------------------------------------|
| Joiner et al. 2017     | DPP-based eHealth interventions on weight loss versus control or pre-post                                                       | Diet and PA      | Meta-analysis           | 15 | 22 (2097) | Weight | 3 to 15 months (mean = 3.8 months) | DPP-based eHealth interventions were associated with a mean % weight loss of -3.98% (95% CI: -4.49 to - 3.46).                                                                                                                                                                                    |                                                                                                                                                 |
| Arambepola et al. 2016 | Mobile messaging plus usual care (UC) vs UC or UC+ minimal intervention                                                         | Diet, PA or both | Meta-analysis           | 17 | 5 (406)   | BMI    | 3-7 months (median 6 months)       | No significant difference in BMI between intervention and controls (Mean diff -0.25 kg/m <sup>2</sup> : 95%CI: -1.02 to 0.52).                                                                                                                                                                    | Only a minority of the trials had low risk of bias                                                                                              |
| Mudaliar et al. 2016   | Lifestyle interventions delivered by community workers versus delivered by health professionals versus electronically delivered | Diet and PA      | Sub-group meta-analysis | 16 | 16 (NR)   | Weight | 3 to 36 months                     | No “statistically significant” differences in FPG were observed between different delivery modes.<br><br>Community workers (Mean diff = - 3.13 kg, 95%CI: -4.66 to -1.59).<br><br>Health professionals (Mean diff = - 3.77 kg, 95%CI: -4.66 to -2.88).<br><br>Electronic media (Mean diff = -5.02 | “Significant differences” defined conservatively in terms of CI’s not overlapping.<br><br>N of participants not reported<br><br>Follow up times |

|                    |                                                                               |             |                         |    |                                  |        |                               |                                                                                                                                                                                                                                                                                                                                                                                                                                                                               |                                                                                                                                         |
|--------------------|-------------------------------------------------------------------------------|-------------|-------------------------|----|----------------------------------|--------|-------------------------------|-------------------------------------------------------------------------------------------------------------------------------------------------------------------------------------------------------------------------------------------------------------------------------------------------------------------------------------------------------------------------------------------------------------------------------------------------------------------------------|-----------------------------------------------------------------------------------------------------------------------------------------|
|                    |                                                                               |             |                         |    |                                  |        |                               | kg, 95%CI: -5.72 to -4.32).                                                                                                                                                                                                                                                                                                                                                                                                                                                   | not taken into account (may be shorter for digital interventions), nor were attrition rates (which tend to be higher in digital trials) |
| Sun et al. 2017    | Lifestyle intervention delivered in person versus by technology (e.g. mobile) | Diet and PA | Sub-group meta-analysis | 16 | Tech 8 (NR)<br>In-person 31 (NR) | Weight | 3 months, 6 months, 12 months | Lifestyle interventions delivered in person and by technology both reduced weight at 3 months (In person SMD = - 0.22, 95% CI: -0.28 to -0.15) (Tech SMD = -0.32 95% CI: - 0.50 to -0.13) and 6 months (In person SMD = -0.88, 95% CI: -1.21 to -0.55) (Tech SMD = -0.92, 95% CI: - 1.68 to -0.15). However at 12 months larger reductions were observed for technology (SMD -0.63, 95% CI: -0.97 to -0.29) than for in person delivery (SMD -0.15, 95% CI: - 0.22 to -0.08). | No data on N participants                                                                                                               |
| Joiner et al. 2017 | Effects of DPP-based eHealth interventions                                    | Diet and PA | Sub-group meta-analysis | 15 | 9 (822)<br>9 (861)               | Weight | 3 to 15 months (mean = 3.8)   | Interventions which were standalone significantly reduced weight (Mean Diff -3.34%, 95% CI: - 4.00 to - 2.86).                                                                                                                                                                                                                                                                                                                                                                |                                                                                                                                         |

|                                  |                                                                                                                                      |                                                                                                           |                                |    |                                                       |                                                                                                                               |                                  |                                                                                                                                                                                                                                                                            |  |
|----------------------------------|--------------------------------------------------------------------------------------------------------------------------------------|-----------------------------------------------------------------------------------------------------------|--------------------------------|----|-------------------------------------------------------|-------------------------------------------------------------------------------------------------------------------------------|----------------------------------|----------------------------------------------------------------------------------------------------------------------------------------------------------------------------------------------------------------------------------------------------------------------------|--|
|                                  | stratified by<br>a)<br>standalone<br>b) supported<br>remotely c)<br>face to face                                                     |                                                                                                           |                                |    | 7 (414)                                               |                                                                                                                               | months)                          | Interventions which were supported<br>remotely significantly reduced<br>weight (Mean Diff -4.31%, 95% CI: -<br>5.26 to – 3.37).<br><br>Interventions which were supported<br>face to face significantly reduced<br>weight (Mean Diff -4.65%, 95% CI: -<br>6.63 to – 2.67). |  |
| Beishui<br>zen et<br>al.<br>2016 | Effectiveness<br>of<br>interventions<br>delivered by<br>internet<br>alone vs<br>internet +<br>clinician<br>(blended<br>intervention) | Multiple CV<br>prevention<br>behaviours<br>(inc diet,<br>PA, glucose<br>monitoring,<br>medication<br>use) | Sub-group<br>meta-<br>analyses | 14 | 26 (7538)<br>blended<br><br>14 (428)<br>internet-only | SMD<br>(Hedge's g)<br>used to<br>pool<br>primary<br>outcome<br>measures:<br>(SBP;<br>HbA1c;<br>weight; PA;<br>CV<br>composite | 3-60<br>months<br>(median<br>12) | The intervention effect was more<br>pronounced in the sample of<br>blended studies (SMD –0.33, 95% CI:<br>–0.43 to –0.22) compared to the<br>sample of Internet-only studies<br>(SMD –0.15, 95% CI: –0.23 to –0.07).                                                       |  |

|                                                        |                                                                                         |                                     |               |    |                                                               |                                                  |                                                                                |                                                                                                                                                                                                                                                                                                              |                                                                                      |
|--------------------------------------------------------|-----------------------------------------------------------------------------------------|-------------------------------------|---------------|----|---------------------------------------------------------------|--------------------------------------------------|--------------------------------------------------------------------------------|--------------------------------------------------------------------------------------------------------------------------------------------------------------------------------------------------------------------------------------------------------------------------------------------------------------|--------------------------------------------------------------------------------------|
|                                                        |                                                                                         |                                     |               |    |                                                               | score)                                           |                                                                                |                                                                                                                                                                                                                                                                                                              |                                                                                      |
| Beishui zen et al. 2016                                | Web-based intervention plus usual care (UC) vs UC (sometimes with minimal intervention) | PA                                  | Meta-analysis | 14 | 14 (4444)                                                     | PA (SMD used to pool different outcome measures) | 3-16 months (median 7.5)                                                       | Intervention significantly increased PA more than controls (SMD 0.25, 95% CI: 0.10 to 0.39).                                                                                                                                                                                                                 | Most studies used self-reported PA from questionnaires (8) or pedometer diaries (5). |
| Cui et al. 2016                                        | Mobile phone app strategies compared to standard diabetes care                          | Diabetes self management, diet & PA | Meta-analysis | 15 | 1 (199)                                                       | PA                                               | 4 months                                                                       | Mobile phone app strategies were associated with a significant increase in PA when compared to the usual care group (MD = 11.73, 95% CI 6.21 to 17.25; P<0.001).                                                                                                                                             | No units of PA mentioned                                                             |
| <i>Group based or individual (one to one) delivery</i> |                                                                                         |                                     |               |    |                                                               |                                                  |                                                                                |                                                                                                                                                                                                                                                                                                              |                                                                                      |
| Odgers-Jewell et al. 2017                              | Group based interventions vs control                                                    | Positive self-management behaviors  | Meta-analysis | 18 | 47 (7055), 30 (4107), 27 (4384), 3 (194), 8 (1106) & 5 (1436) | HbA1c                                            | 6 to 60 months, 6 – 10 months, 12 to 14 months, 18 months, 24 months, 4 months | Group based interventions significantly reduced HbA1c when compared to control at 6 to 60 months (- 0.3% (4 mmol/mol) 95% CI: -0.51 to -0.17, P < 0.0001), 6 to 10 months (-0.3% (3 mmol/mol), 95% CI: -0.48 to -0.15, P = 0.0002) 12 to 14 months (-0.3% (4 mmol/mol), 95% CI: -0.49 to -0.17, P < 0.0001), | The highest heterogeneity was at 24 months                                           |

|                           |                                      |                                           |               |    |                               |        |                                                  |                                                                                                                                                                                                                                               |  |
|---------------------------|--------------------------------------|-------------------------------------------|---------------|----|-------------------------------|--------|--------------------------------------------------|-----------------------------------------------------------------------------------------------------------------------------------------------------------------------------------------------------------------------------------------------|--|
|                           |                                      |                                           |               |    |                               |        | & 36 to 48 months                                | 18 months (-0.7% (8 mmol/mol), 95% CI: -1.26 to -0.18, P < 0.009) & 36 to 48 months (-0.9% (10 mmol/mol), 95% CI: -1.52 to -0.34, P = 0.002) but not at 24 months.                                                                            |  |
| Odgers-Jewell et al. 2017 | Group based interventions vs control | Type 2 diabetes self-management behaviors | Meta-analysis | 18 | 10 (915), 8 (1071), 4 (413)   | FPG    | 6 to 10 months, 12 to 14 months, 24 months       | Group based interventions significantly reduced FPG when compared to control at 12 to 14 months (- 0.68 mmol/l 95% CI: -1.25 to -0.11, P = 0.02) but not at 24 months.                                                                        |  |
| Odgers-Jewell et al. 2017 | Group based interventions vs control | Type 2 diabetes self-management behaviors | Meta-analysis | 18 | 17 (2513), 9 (1564), 4 (1319) | Weight | 6 to 10 months, 12 to 14 months, 36 to 48 months | Group based interventions significantly reduced weight when compared to control at 6 to 10 months (- 1.22 kg 95% CI: -2.22 to -0.23, P = 0.02) and 12 to 14 months (- 1.43 kg 95% CI: -2.09 to -0.77, P < 0.0001) but not at 36 to 48 months. |  |
| Odgers-Jewell et al. 2017 | Group based interventions vs control | Type 2 diabetes self-management behaviors | Meta-analysis | 18 | 18 (2035), 13 (2044), 6 (998) | BMI    | 6 to 10 months, 12 to 14 months, 24 months       | Group based interventions did not significantly reduce BMI at 6 to 10 months, 12 to 14 months or 24 months.                                                                                                                                   |  |

| Odgers-Jewell et al. 2017                                                              | Group based interventions vs control                                                     | Type 2 diabetes self-management behaviors | Meta-analysis                                                                      | 18   | 5 (986), 3 (1088)          | WC                               | 6 to 10 months, 12 to 14 months | Group based interventions significantly reduced WC when compared to control at 6 to 10 months (MD = - 1.19 cm, 95% CI: - 2.34 to -0.05, P = 0.04 but not at 12 to 14 months.                                                                              |                                                    |
|----------------------------------------------------------------------------------------|------------------------------------------------------------------------------------------|-------------------------------------------|------------------------------------------------------------------------------------|------|----------------------------|----------------------------------|---------------------------------|-----------------------------------------------------------------------------------------------------------------------------------------------------------------------------------------------------------------------------------------------------------|----------------------------------------------------|
| <b>2.8: Population characteristics (i.e. demographic and clinical characteristics)</b> |                                                                                          |                                           |                                                                                    |      |                            |                                  |                                 |                                                                                                                                                                                                                                                           |                                                    |
| Study                                                                                  | Comparison                                                                               | Target behaviors                          | Method of comparison                                                               | OQAQ | N studies (N participants) | Outcome                          | Follow up                       | Results                                                                                                                                                                                                                                                   | Comments/ Limitations                              |
| <i>Demographics</i>                                                                    |                                                                                          |                                           |                                                                                    |      |                            |                                  |                                 |                                                                                                                                                                                                                                                           |                                                    |
| Arambepola et al. 2016                                                                 | Effectiveness of mobile messaging intervention in High vs Low-to-Middle Income countries | Diet, PA or both                          | Descriptive (proportion of effective interventions)<br><br>Sub-group meta-analysis | 17   | 13(1155)                   | HbA1c or other clinical outcomes | 2-12 months (median 6 months)   | 100% of interventions were effective in LMICs vs 55% in HICs.<br><br>Similar (and significant) improvements in HbA1c favouring intervention found in LMIC (Mean diff -0.53 kg/m2: 95%CI: -0.69 to -0.37) and HIC (Mean diff -0.53: 95%CI -0.60 to -0.47). | Only a minority of the trials had low risk of bias |
| Zhu et al. 2016                                                                        | Effects of SMBG interventions versus                                                     | Monitoring of blood glucose               | Sub-group meta-analysis                                                            | 16   | NR                         | HbA1c, FPG, BMI; weight          | NR                              | SMBG significantly improved HbA1c levels and BMI regardless of the groups. No evidence of improvements were found in weight.                                                                                                                              |                                                    |

|                         |                                                                                                            |                                                                      |                         |    |                                        |                                              |                         |                                                                                                                                                                                       |                                                                                                                                                                         |
|-------------------------|------------------------------------------------------------------------------------------------------------|----------------------------------------------------------------------|-------------------------|----|----------------------------------------|----------------------------------------------|-------------------------|---------------------------------------------------------------------------------------------------------------------------------------------------------------------------------------|-------------------------------------------------------------------------------------------------------------------------------------------------------------------------|
|                         | control stratified by Asian populations & populations from America and Europe                              |                                                                      |                         |    |                                        |                                              |                         |                                                                                                                                                                                       |                                                                                                                                                                         |
| Cai et al. 2016         | Association of age, gender, baseline BMI baseline PA on the effectiveness of pedometer based interventions | PA                                                                   | Meta-regression         | 14 | 8 (nr)<br>7 (nr)<br>8 (nr)<br>6 (nr)   | BMI, Weight                                  | 6 to 48 weeks           | No significant associations were found between age, gender, baseline BMI, or baseline PA on intervention effectiveness.                                                               | The overall effect size was low, so meta-regression with such a small number of studies is unlikely to be well-powered. Component RCTs were of low to moderate quality. |
| Beishui zen et al. 2016 | Studies with populations of relatively low age (not all participants)                                      | Multiple CV prevention behaviours (inc diet, PA, glucose monitoring, | Sub-group meta-analyses | 14 | 33 (nr)<br><br>29 (nr) not all over 50 | SMD (Hedge's g) used to pool primary outcome | 3-60 months (median 12) | The pooled effect size was larger for older participants (SMD -0.30, 95%CI: -0.51 to -0.09) than for studies with relatively younger participants (SMD -0.23, 95%CI: -0.33 to -0.14). | Confidence intervals largely overlapped                                                                                                                                 |

|                                                    |                                                                             |                                         |                         |    |                                                   |                                                        |                     |                                                                                                                                                                                                                                                                    |  |
|----------------------------------------------------|-----------------------------------------------------------------------------|-----------------------------------------|-------------------------|----|---------------------------------------------------|--------------------------------------------------------|---------------------|--------------------------------------------------------------------------------------------------------------------------------------------------------------------------------------------------------------------------------------------------------------------|--|
|                                                    | older than 50 years) vs. older age (all older than 50 years)                | medication use)                         |                         |    | 4 (nr) all over 50                                | measures: (SBP; HbA1c; weight; PA; CV composite score) |                     |                                                                                                                                                                                                                                                                    |  |
| <i>Glycaemic status /duration of hyperglycemia</i> |                                                                             |                                         |                         |    |                                                   |                                                        |                     |                                                                                                                                                                                                                                                                    |  |
| Cui et al. 2016                                    | Mobile phone app effectiveness stratified by HbA1c < 8%                     | Diabetes self management, diet & PA     | Sub-group meta-analyses | 15 | 4 (696)                                           | HbA1c                                                  | 3 to 12 months      | For patients with HbA1c > 8% at baseline, there was no significant difference between the intervention group and control group (p = 0.33). For the subgroup with baseline HbA1c < 8% there was a significant reduction in HbA1c (MD -0.33% 95%CI: -0.59 to -0.06%. |  |
| Daly et al. 2017                                   | Nurse led intervention effectiveness stratified by HbA1c < 8% or HbA1c ≥ 8% | Lifestyle changes, medication adherence | Sub-group meta-analyses | 14 | 36 (6920)<br>Sub group figures = 14 (NR), 22 (NR) | HbA1c                                                  | 3 months to 5 years | For patients with baseline HbA1c of <8% the MD was -0.12% (95% CI: -0.24 to 0.00).<br><br>For people with a baseline of > 8 HbA1c the MD was -0.48% (95% CI: -0.65 to -0.30).                                                                                      |  |
| Zhang et al.                                       | Lifestyle intervention versus                                               | Diet and PA                             | Sub-group meta-         | 18 | 2 (246)<br><br>11 (2940)                          | HbA1c                                                  | 12 to 54 months     | Lifestyle interventions were associated with significantly reduced HbA1c versus control for people with                                                                                                                                                            |  |



|                   |                                                                                                                       |             |                         |    |                         |     |                 |                                                                                                                                                                                                                                                                                                   |  |
|-------------------|-----------------------------------------------------------------------------------------------------------------------|-------------|-------------------------|----|-------------------------|-----|-----------------|---------------------------------------------------------------------------------------------------------------------------------------------------------------------------------------------------------------------------------------------------------------------------------------------------|--|
| 2016              | control stratified by FPG <5.5 mmol/L or HbA1c <5.5% and FPG ≥5.5 mmol/L or HbA1c ≥5.5%                               |             | analysis                |    |                         |     |                 | lower baseline FPG or HbA1c (MD -0.07%, 95% CI: -0.14 to -0.01). Similar reductions were found for people with higher baseline FPG or HbA1c (MD -0.05%, 95% CI:-0.09 to -0.02).                                                                                                                   |  |
| Zhang et al. 2016 | Lifestyle intervention versus control stratified by FPG <5.5 mmol/L or HbA1c <5.5% and FPG ≥5.5 mmol/L or HbA1c ≥5.5% | Diet and PA | Sub-group meta-analysis | 18 | 24 (4383), 31 (4941)    | FPG | 12 to 54 months | Lifestyle interventions were associated with significantly reduced FPG versus control for people with lower baseline FPG or HbA1c (-0.09mmol/L 95% CI: -0.13 to -0.05). Slightly larger reductions were found for people with higher baseline FPG or HbA1c (-0.18 mmol/L, 95% CI:-0.25 to -0.11). |  |
| Zhang et al. 2016 | Lifestyle intervention versus control stratified by FPG <5.5                                                          | Diet and PA | Sub-group meta-analysis | 18 | 12 (1551))<br>21 (3747) | FI  | 12 to 54 months | Lifestyle interventions were associated with significantly reduced FI versus control for people with lower baseline FPG or HbA1c -11.69 %, 95% CI: -16.99 to -6.38). Slightly larger reductions were found for                                                                                    |  |

|                   |                                                                                                                       |             |                         |    |                        |           |                 |                                                                                                                                                                                                                                                                                             |  |
|-------------------|-----------------------------------------------------------------------------------------------------------------------|-------------|-------------------------|----|------------------------|-----------|-----------------|---------------------------------------------------------------------------------------------------------------------------------------------------------------------------------------------------------------------------------------------------------------------------------------------|--|
|                   | mmol/L or HbA1c <5.5% and FPG ≥5.5 mmol/L or HbA1c ≥5.5%                                                              |             |                         |    |                        |           |                 | people with higher baseline FPG or HbA1c (-16.56 %, 95% CI:-23.14 to -9.98).                                                                                                                                                                                                                |  |
| Zhang et al. 2016 | Lifestyle intervention versus control stratified by FPG <5.5 mmol/L or HbA1c <5.5% and FPG ≥5.5 mmol/L or HbA1c ≥5.5% | Diet and PA | Sub-group meta-analysis | 18 | 6 (957)<br>14 (2009)   | HOMA-IR   | 12 to 54 months | Lifestyle interventions were associated with significantly reduced HOMA-IR versus control for people with lower baseline FPG or HbA1c (MD -14.68, 95% CI: -25.20 to -4.17). Larger reductions were found for people with higher baseline FPG or HbA1c (MD -28.05, 95% CI:-35.43 to -20.67). |  |
| Zhang et al. 2016 | Lifestyle intervention versus control stratified by FPG <5.5 mmol/L or HbA1c <5.5% and FPG ≥5.5                       | Diet and PA | Sub-group meta-analysis | 18 | 19 (3285)<br>30 (5443) | Weight kg | 12 to 54 months | Lifestyle interventions were associated with significantly reduced weight versus control for people with lower baseline FPG or HbA1c -4.20%, 95%CI: -5.14 to -3.27). Slightly smaller reductions were found for people with higher baseline FPG or HbA1c (-3.63, 95% CI:-4.75 to -2.52).    |  |

|                         |                                                                                                       |                                         |                         |    |                                              |                                     |                     |                                                                                                                                                                                                                                                      |                                                                                                          |
|-------------------------|-------------------------------------------------------------------------------------------------------|-----------------------------------------|-------------------------|----|----------------------------------------------|-------------------------------------|---------------------|------------------------------------------------------------------------------------------------------------------------------------------------------------------------------------------------------------------------------------------------------|----------------------------------------------------------------------------------------------------------|
|                         | mmol/L or HbA1c ≥5.5%                                                                                 |                                         |                         |    |                                              |                                     |                     |                                                                                                                                                                                                                                                      |                                                                                                          |
| Daly et al. 2017        | Nurse led intervention versus usual care stratified by diabetes diagnosis for <10 years or ≥ 10 years | Lifestyle changes, medication adherence | Sub-group meta-analyses | 14 | 26 (NR) Sub-group figures = 15 (NR), 15 (NR) | HbA1c                               | 3 months to 5 years | The mean difference for trials with patients who had a diagnosis of diabetes for <10 years HbA1c was -0.28% (95% CI: -0.48 to -0.08, p = 0.005) compared with -0.55% (95% CI: -0.82 to -0.27, p = 0.0001) for people with a diagnosis of ≥ 10 years. |                                                                                                          |
| Zhu et al. 2016         | Effects of SMBG interventions versus control stratified by Late versus early stage of diabetes        | Monitoring of blood glucose             | Sub-group meta-analysis | 16 | NR<br><br>NR                                 | HbA1c, FPG, BMI; TGs, WC and weight | NR                  | The SMBG group outperformed the control group for HbA1c, BMI and TC, indicating that SMBG was effective in controlling blood glucose in the later phase of diabetes.                                                                                 | Only two trials with three sub studies were conducted in newly diagnosed patients but were not reported. |
| Baskerville et al. 2017 | Effectiveness of PA self-monitoring devices for people with shorter or                                | PA                                      | Sub-group meta-analysis | 16 | 10 (1372)                                    | PA                                  | 1 to 18 months      | Analysis suggested a possible increased effect in diabetes diagnosed within 5 years (SMD 0.82, 95% CI: 0.11 to 1.54) compared with people having diabetes for over 5 years (SMD 0.58, 95% CI: -0.12 to                                               | Not clear if PA was measured objectively. Component studies mostly had a moderate                        |

|                                      | longer duration of diabetes                                                    |                  |                         |      |                            |         |                | 1.28).                                                                                                                                                                                                                                                                        | risk of bias.                                      |
|--------------------------------------|--------------------------------------------------------------------------------|------------------|-------------------------|------|----------------------------|---------|----------------|-------------------------------------------------------------------------------------------------------------------------------------------------------------------------------------------------------------------------------------------------------------------------------|----------------------------------------------------|
| <b>2.9: Provider</b>                 |                                                                                |                  |                         |      |                            |         |                |                                                                                                                                                                                                                                                                               |                                                    |
| Study                                | Comparison                                                                     | Target behaviors | Method of comparison    | OQAQ | N studies (N participants) | Outcome | Follow up      | Results                                                                                                                                                                                                                                                                       | Comments/ Limitations                              |
| <i>Dietitians vs other providers</i> |                                                                                |                  |                         |      |                            |         |                |                                                                                                                                                                                                                                                                               |                                                    |
| Moller et al. 2017                   | Dietitian provided vs GP/nurse provided dietary advice                         | Diet             | Meta-analysis           | 15   | 5 (912)                    | HbA1c   | 6 or 12 months | Nutrition therapy interventions significantly reduced HbA1c by 0.45% (95% CI: 0.36 to 0.53) compared to standard dietary advice.                                                                                                                                              | Evidence was consider low quality by study authors |
| Sun et al. 2017                      | Lifestyle intervention vs control stratified by dietitian versus non-dietitian | Diet and PA      | Sub-group meta-analysis | 16   | NR (NR)                    | HbA1c   | 12 months      | Dietitian-delivered programs produced greater effect size for HbA1c than non-dietitian delivered programs at 12 months. Hedges' g: -0.43 (95% CI: -0.70 to -0.16) for programs delivered by dietitian and -0.26 (95% CI: -0.55 to 0.03 for those delivered by non-dietitians. | No data on N studies or participants               |
| Cradock et al.                       | Impact of dietitian /nutritionist                                              | Diet             | Moderator analyses      | 14   | 32 (NR)                    | HbA1c   | 1 to 24 months | Contact with a dietitian /nutritionist was significantly associated with a                                                                                                                                                                                                    |                                                    |

|                 |                                                                                |             |                         |    |         |     |                                                   |                                                                                                                                                                                                                                                                                                                                                                                                                                                              |                                      |
|-----------------|--------------------------------------------------------------------------------|-------------|-------------------------|----|---------|-----|---------------------------------------------------|--------------------------------------------------------------------------------------------------------------------------------------------------------------------------------------------------------------------------------------------------------------------------------------------------------------------------------------------------------------------------------------------------------------------------------------------------------------|--------------------------------------|
| 2017            | contact on dietary intervention effectiveness                                  |             |                         |    |         |     |                                                   | reduction in HbA1c (0.28%, p=0.04).                                                                                                                                                                                                                                                                                                                                                                                                                          |                                      |
| Sun et al. 2017 | Lifestyle intervention vs control stratified by dietitian versus non-dietitian | Diet and PA | Sub-group meta-analysis | 16 | NR (NR) | FPG | 3 months<br>6 months<br>12 months<br>13-60 months | <p>Dietitian-delivered programs produced greater effect size for FPG than non-dietitian delivered.</p> <p>programs at 6, 12 and 13-60 months, but not at 3 months.</p> <p>3 months: Hedge's g: -0.34 (95% CI: -0.54 to -0.14 vs -0.18 (95% CI: -0.44 to 0.07).</p> <p>6 months: Hedge's g: -1.81 (95% CI: -5.78 to -2.16 vs -0.47 (95% CI: -0.78 to -0.15).</p> <p>12 months: Hedge's g: -0.42 (95% CI: -0.70 to -0.14 vs -0.17 (95% CI: -0.37 to 0.04).</p> | No data on N studies or participants |

|                 |                                                                                |             |                         |    |         |        |                                               |                                                                                                                                                                                                                                                                                                                                                                                                                                                                |                                      |
|-----------------|--------------------------------------------------------------------------------|-------------|-------------------------|----|---------|--------|-----------------------------------------------|----------------------------------------------------------------------------------------------------------------------------------------------------------------------------------------------------------------------------------------------------------------------------------------------------------------------------------------------------------------------------------------------------------------------------------------------------------------|--------------------------------------|
|                 |                                                                                |             |                         |    |         |        |                                               | 13-60 months: Hedge's g: -0.21 (95% CI: -0.29 to -0.12 vs 0.04 (95% CI: -0.07 to 0.15)).                                                                                                                                                                                                                                                                                                                                                                       |                                      |
| Sun et al. 2017 | Lifestyle intervention vs control stratified by dietitian versus non-dietitian | Diet and PA | Sub-group meta-analysis | 16 | NR (NR) | 2-h BG | 6 months<br><br>12 months<br><br>13-60 months | <p>Dietitian-delivered programs produced greater effect size for 2-hr BG than non-dietitian delivered.</p> <p>programs at 12 and 13-60 months, but not at 6 months.</p> <p>6 months: Hedge's g: 0.06 (95% CI: -0.08 to 0.20 vs -0.22 (95% CI: -0.42 to -0.01).</p> <p>12 months: Hedge's g: -0.44 (95% CI: -0.51 to -0.38 vs -0.09 (95% CI: -0.22 to 0.05).</p> <p>13-60 months: Hedge's g: -0.13 (95% CI: -0.23 to -0.04 vs 0.02 (95% CI: -0.09 to 0.12).</p> | No data on N studies or participants |
| Moller          | Dietitian                                                                      | Diet        | Meta-                   | 15 | 3 (611) | Weight | 6 or 12                                       | Nutrition therapy interventions                                                                                                                                                                                                                                                                                                                                                                                                                                | Evidence was                         |

|                 |                                                                                |             |                         |    |         |        |                                                   |                                                                                                                                                                                                                                                                                                                                                                                                                                                            |                                          |
|-----------------|--------------------------------------------------------------------------------|-------------|-------------------------|----|---------|--------|---------------------------------------------------|------------------------------------------------------------------------------------------------------------------------------------------------------------------------------------------------------------------------------------------------------------------------------------------------------------------------------------------------------------------------------------------------------------------------------------------------------------|------------------------------------------|
| et al. 2017     | provided vs GP/nurse provided dietary advice                                   |             | analysis                |    |         |        | months                                            | significantly reduced weight by 2.06 kg (95% CI: 2.94 to 1.18) compared to standard dietary advice                                                                                                                                                                                                                                                                                                                                                         | consider medium quality by study authors |
| Sun et al. 2017 | Lifestyle intervention vs control stratified by dietitian versus non-dietitian | Diet and PA | Sub-group meta-analysis | 16 | NR (NR) | Weight | 3 months<br>6 months<br>12 months<br>13-60 months | Dietitian-delivered programs produced greater effect size for weight than non-dietitian delivered.<br>programs at 6 and 13-60 months and a similar effect at 3 and 12 months.<br>3 months: Hedge's g: -0.26 (95% CI: -0.34 to -0.18 vs -0.20 (95% CI: -0.28 to 0.12)).<br>6 months: Hedge's g: -0.99 (95% CI: -2.11 to 0.12 vs -0.28 (95% CI: -0.36 to -0.19)).<br>12 months: Hedge's g: -0.30 (95% CI: -0.40 to -0.21 vs -0.26 (95% CI: -0.34 to -0.18)). | No data on N                             |

|                           |                                                                     |                                    |                         |    |           |       |                |                                                                                                                                                           |                                                    |
|---------------------------|---------------------------------------------------------------------|------------------------------------|-------------------------|----|-----------|-------|----------------|-----------------------------------------------------------------------------------------------------------------------------------------------------------|----------------------------------------------------|
|                           |                                                                     |                                    |                         |    |           |       |                | 13-60 months: Hedge's g: -0.24 (95% CI: -0.44 to -0.04 vs 0.04 (95% CI: -0.08 to -0.01).                                                                  |                                                    |
| Moller et al. 2017        | Dietitian provided vs GP/nurse provided dietary advice              | Diet                               | Meta-analysis           | 15 | 4 (764)   | BMI   | 6 or 12 months | Nutrition therapy interventions significantly reduced BMI by 0.55 kg/m <sup>2</sup> (95% CI: 1.07 to 0.02) compared to standard dietary advice.           | Evidence was consider low quality by study authors |
| <i>Other providers</i>    |                                                                     |                                    |                         |    |           |       |                |                                                                                                                                                           |                                                    |
| Odgers-Jewell et al. 2017 | Group based interventions which were peer led vs control            | Positive self-management behaviors | Sub-group meta-analysis | 18 | 5 (1066)  | HbA1c | 6 to 60 months | Group based interventions which were peer led showed no significant reduction in HbA1c when compared to control. Mean Diff: 0.02% (95%CI: -0.12 to 0.16). |                                                    |
| Odgers-Jewell et al. 2017 | Group based interventions led by health professional versus control | Positive self-management behaviors | Sub-group meta-analysis | 18 | 5 (1019)  | HbA1c | 6 to 60 months | Group based interventions which were led by health professionals showed significantly reduced HbA1c compared to control (-0.27, 95% CI:-0.48 to -0.06).   |                                                    |
| Odgers-Jewell             | Group based interventions                                           | Positive self-                     | Sub-group meta-         | 18 | 17 (2134) | HbA1c | 6 to 60        | Group based interventions which were led by a single disciplinary                                                                                         |                                                    |



|                              |                                                                                                          |                                    |                         |    |           |             |                      |                                                                                                                                                                                                                                                              |                                                                                                                                      |
|------------------------------|----------------------------------------------------------------------------------------------------------|------------------------------------|-------------------------|----|-----------|-------------|----------------------|--------------------------------------------------------------------------------------------------------------------------------------------------------------------------------------------------------------------------------------------------------------|--------------------------------------------------------------------------------------------------------------------------------------|
| et al.<br>2017               | delivered by a single disciplinary team versus control                                                   | management behaviors               | analysis                |    |           |             | months               | team showed significantly reduced HbA1c compared to control (-0.56, 95% CI:-0.86 to -0.26).                                                                                                                                                                  |                                                                                                                                      |
| Odgers-Jewell et al.<br>2017 | Group based interventions delivered by a multidisciplinary team<br>Multidisciplinary team versus control | Positive self-management behaviors | Sub-group meta-analysis | 18 | 20 (2836) | HbA1c       | 6 to 60 months       | Group based interventions which were led by a multidisciplinary disciplinary team showed significantly reduced HbA1c compared to control (-0.24, 95% CI:-0.43 to -0.04).                                                                                     |                                                                                                                                      |
| Pousinho et al.<br>2016      | Pharmacist delivered versus usual care                                                                   | Self-management                    | Descriptive             | 17 | 26 (NR)   | HbA1c       | 45 days to 24 months | 24/26 studies reported a greater improvement in HbA1c for the intervention group compared with controls. The difference in A1c change ranged from -0.18% to -2.1%. 15 studies reported a <i>significant</i> difference in HbA1c change between the 2 groups. | 1 study, found a significant difference between groups for baseline A1c and the appropriate statistical adjustment was not conducted |
| Pousinho et                  | Pharmacist delivered                                                                                     | Self-management                    | Descriptive             | 17 | 23 (NR)   | Mixed blood | 45 days to 24        | 20/23 studies reported a greater improvement in blood glucose in the                                                                                                                                                                                         |                                                                                                                                      |

|                                |                                                   |                                                  |                   |    |           |                                                               |                            |                                                                                                                                                                                                                                                                                                 |                                                     |
|--------------------------------|---------------------------------------------------|--------------------------------------------------|-------------------|----|-----------|---------------------------------------------------------------|----------------------------|-------------------------------------------------------------------------------------------------------------------------------------------------------------------------------------------------------------------------------------------------------------------------------------------------|-----------------------------------------------------|
| al.<br>2016                    | versus usual<br>care                              | nt                                               |                   |    |           | glucose<br>measures<br>(fasting,<br>postprandi<br>al, random) | months                     | intervention group compared with<br>controls. The difference in change<br>between both groups ranged from -<br>5.9 mg dL-1 to -66.87 mg dL-1 and<br>was statistically <i>significant</i> in 5/23<br>studies.                                                                                    |                                                     |
| Pousin<br>ho et<br>al.<br>2016 | Pharmacist<br>delivered<br>versus usual<br>care   | Self-<br>manageme<br>nt                          | Descriptive       | 17 | 14 (NR)   | BMI                                                           | 45 days<br>to 24<br>months | 12/14 studies reported a greater<br>reduction in BMI in the intervention<br>group compared with controls. Only<br>1/14 studies revealed a statistically<br>significant difference. The difference<br>in change between the 2 groups<br>ranged from +0.4 kg m-2 to -2.77 kg<br>m <sup>-2</sup> . |                                                     |
| Daly et<br>al.<br>2017         | Nurse led<br>intervention<br>versus usual<br>care | Lifestyle<br>changes,<br>medication<br>adherence | Meta-<br>analysis | 14 | 36 (6920) | HbA1c                                                         | 3 months<br>to 5<br>years  | The was a small but significant<br>reduction in HbA1c for nurse led<br>interventions compared to usual<br>care (-0.28%, 95% CI: -0.38% to -<br>0.18%, p < 0.0001).                                                                                                                              | Hight<br>heterogeneity (I2<br>= 68%, p <<br>0.0001) |
| Daly et<br>al.<br>2017         | Nurse led<br>intervention<br>versus usual<br>care | Lifestyle<br>changes,<br>medication<br>adherence | Meta-<br>analysis | 14 | 12 (1944) | BMI                                                           | 3 months<br>to 5<br>years  | The was no significant reduction in<br>BMI for nurse led interventions<br>compared to usual care (-0.05; 95%<br>CI: -0.51 to 0.42, p < 0.84).                                                                                                                                                   |                                                     |
